# Supplementary material for: Effect of ionic liquids on the conformation of a porphyrin-based viscometer
Source: Royal Society of Chemistry journal article supplement (doi:10.1039/c3ra43001d), 2013-01-01
Supplement: c3ra43001d.pdf [file c3ra43001d.pdf]

## SUPPORTING INFORMATION

### Effect of ionic liquids on the conformation of a porphyrin-based viscometer

Laramie P. Jameson,<sup>a</sup> Joseph D. Kimball,<sup>b</sup> Zygmunt Gryczynski,<sup>b</sup> Milan Balaz,<sup>\*c</sup> and Sergei V. Dzyuba<sup>\*a</sup>

<sup>a</sup> Department of Chemistry, Texas Christian University, Fort Worth, TX 76129, USA. Fax: +1 817 257 5851; Tel: +1 817 257 6218; E-mail: s.dzyuba@tcu.edu

<sup>b</sup> Department of Physics and Astronomy, Texas Christian University, Fort Worth, TX 76129, USA

<sup>c</sup> Department of Chemistry, University of Wyoming, Laramie, WY 82071, USA. Fax: +1 307 766-2807; Tel: +1 307 766-4330; E-mail: mbalaz@uwoyo.edu

## TABLE OF CONTENTS

|                                                                                                |    |
|------------------------------------------------------------------------------------------------|----|
| Materials and methods.....                                                                     | 2  |
| Synthesis and characterization of ionic liquids.....                                           | 3  |
| Table S1 Properties of glycerol-ethanol mixtures.....                                          | 5  |
| Table S2 Properties of tetraethylene glycol as a function of temperature .....                 | 5  |
| Table S3 Properties of ionic liquids.....                                                      | 5  |
| Table S4 Properties of glycerol-ethanol (80-20 v/v) mixture as a function of temperature...    | 6  |
| Table S5 Properties of tetraethylene glycol as a function of temperature .....                 | 6  |
| Table S6 Properties of [C <sub>4</sub> -mim]NO <sub>3</sub> as a function of temperature ..... | 6  |
| Table S7 Properties of [C <sub>4</sub> -mim]PF <sub>6</sub> as a function of temperature ..... | 6  |
| Table S8 Properties of [C <sub>9</sub> -mim]PF <sub>6</sub> as a function of temperature ..... | 7  |
| Table S9 Effect of water on the properties of [C <sub>4</sub> -mim]NO <sub>3</sub> .....       | 7  |
| Figure S1 Absorptions spectra of PD in molecular and ionic liquids.....                        | 8  |
| Figure S2 Emission spectra of PD in [C <sub>4</sub> -mim]-containing ionic liquids,,,...       | 9  |
| Figure S3 Emission spectra of PD in various ionic liquids.....                                 | 10 |
| Figure S4 Emission spectra of PD in some [C <sub>9</sub> -mim]-containing ionic liquids.....   | 11 |
| Figure S5 Emission spectra of PD in molecular solvents as a function of temperature .....      | 12 |
| Figure S6 Emission spectra of PD in ILs as a function of temperature .....                     | 13 |
| Figure S7 Effect of molecular solvent viscosities on the conformation of PD.....               | 14 |
| Figure S8 MALDI-TOF and HPLC of PD.....                                                        | 15 |
| References.....                                                                                | 16 |

## Materials and methods

All reagents and solvents were from commercial sources (Sigma-Aldrich, Acros, Alfa Aesar) and were used as received. Ionic liquids were synthesized and purified according to literature procedures, see below for details.<sup>1</sup> **PD** was prepared according to literature procedure;<sup>2</sup> the structure and purity were confirmed by MALDI-TOF spectrometry and HPLC, respectively (Figure S8).

A 1 mM concentration stock solution of **PD** in DMSO was prepared fresh prior to experiments, used within 48 h for all spectroscopic measurements, and protected from direct light exposure during storage. All solutions of **PD** in ILs were prepared by addition of the DMSO stock solution to the ionic liquid, followed by vortexing at 3000 rpm for 10-30 seconds.

NMR spectra were recorded on a Varian (300 MHz) spectrometer. <sup>1</sup>H NMR chemical shifts are reported in ppm (δ) downfield from residual DMSO in DMSO-d<sub>6</sub>; <sup>19</sup>F resonances are reported relative to trifluoroacetic acid (δ = -76.5 ppm).

Absorption spectra were acquired on an Agilent 8453 UV-vis instrument using 1.0 cm quartz cells. The absorption maxima of the Soret band in molecular solvents and their mixtures was centered around 470 nm, for ionic liquids at 475 nm.

Fluorescence measurements were performed using a Shimadzu RF-5301PC as follows: for all molecular solvents and molecular solvent mixtures λ<sub>ex</sub> was 470 nm; for all ionic liquids λ<sub>ex</sub> was 475 nm; emission spectra were collected from 600 to 900 nm; excitation and emission slit widths were 3 nm and 3 nm; sensitivity – high; 1.0 cm quartz cell. All spectra were background subtracted using appropriate blanks, and subsequently smoothed using manufacturer provided software. Temperature dependent measurements were performed using Agilent-Cary spectrophotometer with a Peltier temperature controller as follows: λ<sub>ex</sub> was 470 nm; emission spectra were collected from 600 to 900 nm using 5 scans; excitation and emission slit widths were 10 nm and 10 nm; 1.0 cm quartz cell. The samples were equilibrated for 5 min at a given temperature before the emission spectra were measured. All spectra were background subtracted using the appropriate blanks.

Percent of the twisted PD conformation (twisted PD / %) was calculated as follows:

$$\text{twisted PD / \%} = (F^{\text{max}}_{\text{twisted}}) / (F^{\text{max}}_{\text{twisted}} + F^{\text{max}}_{\text{planar}}) \cdot 100\%$$

where  $F^{\text{max}}_{\text{twisted}}$  is the maximum fluorescence intensity of the twisted conformation;  $F^{\text{max}}_{\text{planar}}$  is the maximum fluorescence intensity of the planar conformation

Water content of ILs was measured using Aquamax KF coulometric titrator from GRS Scientific according to manufacturer provided protocols, using 0.4 or 0.5 ml of sample.

Viscosity and density of ILs was measured using Anton-Paar Lovis 4500M microviscometer. Fluorescence measurements were performed concurrently with the water content measurements.

## Synthesis and characterization of ionic liquids

All ionic liquids were prepared according to literature procedures or modified literature procedures<sup>1</sup> following the general sequences shown below. All ionic liquids were purified as follows: ionic liquids were dissolved in CH<sub>2</sub>Cl<sub>2</sub>, followed by filtration to get rid of inorganic impurities. Next, ionic liquids were repeatedly treated with charcoal in EtOH at elevated temperatures followed by filtration and removal of EtOH in vacuo (for an azeotropic removal of residual water). Finally, the ionic liquids were dried under vacuum for 8-12 hours. All sample preparations and spectroscopic measurements were conducted immediately after removing the ionic liquids from the vacuum with care to minimize the exposure to moisture.

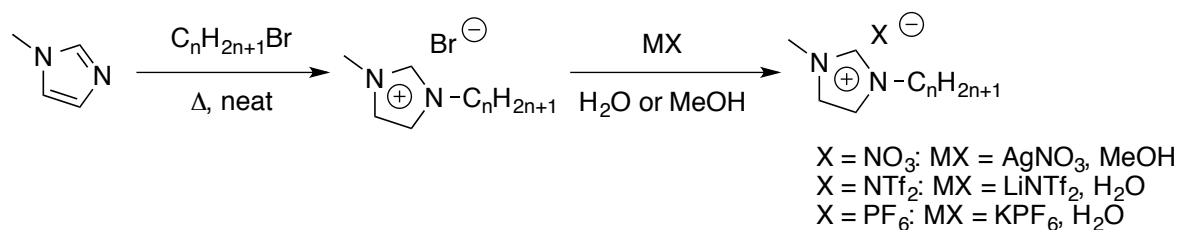

### [C<sub>4</sub>-mim]NO<sub>3</sub>:<sup>3</sup>

<sup>1</sup>H NMR (300 MHz, DMSO-d<sub>6</sub>): δ = 9.16 (s, 1H), 7.78 (t, *J* = 1.8 Hz, 1H), 7.70 (t, *J* = 1.8 Hz, 1H), 4.15 (t, *J* = 7.2 Hz, 2H), 3.84 (s, 3H), 1.74 (pent, *J* = 7.4 Hz, 2H), 1.23 (sext, *J* = 7.4 Hz, 2H), 0.87 (t, *J* = 6.9 Hz, 3H)

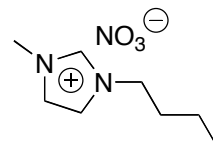

### [C<sub>9</sub>-mim]NO<sub>3</sub>:<sup>4</sup>

<sup>1</sup>H NMR (300 MHz, DMSO-d<sub>6</sub>) δ = 9.15 (s, 1H), 7.78 (t, *J* = 1.8 Hz, 1H), 7.71 (t, *J* = 1.8 Hz, 1H), 4.15 (t, *J* = 7.2 Hz, 2H), 3.85 (s, 3H), 1.77 (pent, *J* = 7.2 Hz, 2H), 1.24 (m, 12H), 0.85 (t, *J* = 6.6 Hz, 3H)

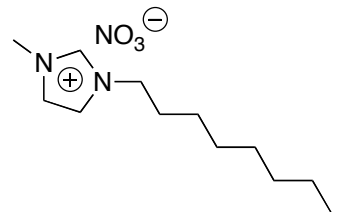

### [C<sub>4</sub>-mim]PF<sub>6</sub>:<sup>5</sup>

<sup>1</sup>H NMR (300 MHz, DMSO-d<sub>6</sub>): δ = 9.08 (s, 1H), 7.74 (s, 1H), 7.67 (s, 1H), 4.14 (t, *J* = 6.9 Hz, 2H), 3.83 (s, 3H), 1.75 (pent, *J* = 7.2 Hz, 2H), 1.24 (sext, *J* = 7.2 Hz, 2H), 0.89 (t, *J* = 7.2 Hz, 3H);

<sup>19</sup>F NMR (300 MHz, DMSO-d<sub>6</sub>): δ = -70.2 (d, *J* = 710.4 Hz)

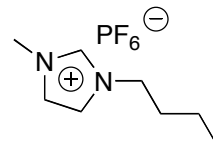

**[C<sub>9</sub>-mim]PF<sub>6</sub>:<sup>5</sup>**

<sup>1</sup>H NMR (300 MHz, DMSO-d<sub>6</sub>): δ = 9.07 (s, 1H), 7.74 (m, 1H), 7.68 (m, 1H), 4.13 (t, *J* = 7.1 Hz, 2H), 3.83 (s, 3H), 1.76 (pent, *J* = 7.5 Hz, 2H), 1.23 (m, 12H), 0.84 (t, *J* = 7.5 Hz, 3H);

<sup>19</sup>F NMR (DMSO-d<sub>6</sub>): δ = -70.2 (d, *J* = 713.5 Hz)

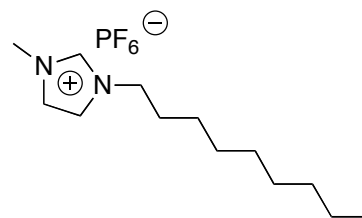

**[C<sub>2</sub>-mim]NTf<sub>2</sub>:<sup>5</sup>**

<sup>1</sup>H NMR (300 MHz, DMSO-d<sub>6</sub>): δ = 9.09 (s, 1H), 7.56 (s, 1H), 7.67 (s, 1H), 4.17 (q, *J* = 7.5 Hz), 3.83 (s, 2H), 1.40 (t, *J* = 7.5 Hz, 3H);

<sup>19</sup>F NMR (300 MHz, DMSO-d<sub>6</sub>): δ = -78.8 (s)

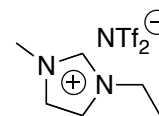

**[C<sub>4</sub>-mim]NTf<sub>2</sub>:<sup>5</sup>**

<sup>1</sup>H NMR (300 MHz, DMSO-d<sub>6</sub>): δ = 9.09 (s, 1H), 7.75 (t, *J* = 1.8 Hz, 1H), 7.68 (t, *J* = 1.8 Hz, 1H), 4.14 (t, *J* = 6.9 Hz, 2H), 3.83 (s, 3H), 1.75 (pent, *J* = 7.5 Hz, 2H), 1.24 (sext, *J* = 7.5 Hz, 2H), 0.89 (t, *J* = 7.2 Hz, 3H);

<sup>19</sup>F NMR (300 MHz, DMSO-d<sub>6</sub>): δ = -78.8 (s)

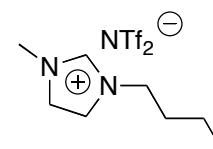

**[C<sub>9</sub>-mim]NTf<sub>2</sub>:<sup>5</sup>**

<sup>1</sup>H NMR (300 MHz, DMSO-d<sub>6</sub>): δ = 9.08 (s, 1H), 7.74 (s, 1H), 7.68 (s, 1H), 4.13 (t, *J* = 7.5 Hz, 2H), 3.83 (s, 3H), 1.76 (m, 2H), 1.23 (m, 12H), 0.87 (m, 3H).

<sup>19</sup>F NMR (300 MHz, DMSO-d<sub>6</sub>): δ = -78.8 (s)

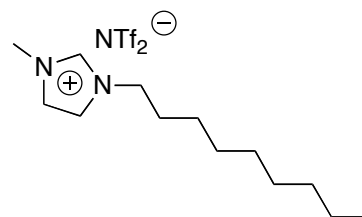

**[C<sub>12</sub>-mim]NTf<sub>2</sub>:<sup>6</sup>**

<sup>1</sup>H NMR (300 MHz, DMSO-d<sub>6</sub>): δ = 9.08 (s, 1H), 7.75 (s, 1H), 7.68 (s, 1H), 4.13 (t, *J* = 7.0 Hz, 2H), 3.83 (s, 3H), 1.75 (m, 2H), 1.22 (m, 18H), 0.84 (m, 3H);

<sup>19</sup>F NMR (300 MHz, DMSO-d<sub>6</sub>): δ = -78.8 (s)

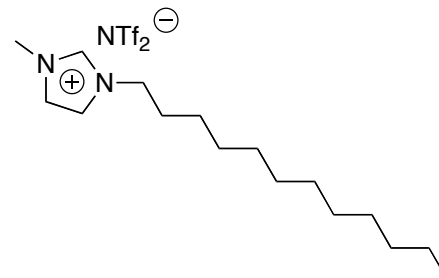

**Table S1.** Properties of glycerol-ethanol mixtures<sup>a</sup>

| Entry | Glycerol – EtOH (v/v) | Viscosity, mPa•s | Density, g/cm <sup>3</sup> |
|-------|-----------------------|------------------|----------------------------|
| 1     | 0 – 10                | 1.2              | 0.78942                    |
| 2     | 1 – 9                 | 2.4              | 0.84845                    |
| 3     | 3 – 7                 | 7.6              | 0.94313                    |
| 4     | 5 – 5                 | 39               | 1.05342                    |
| 5     | 7 – 3                 | 108              | 1.11474                    |
| 6     | 8 – 2                 | 241              | 1.16188                    |
| 7     | 9 – 1                 | 664              | 1.22316                    |
| 8     | 10 – 0                | 1457             | 1.23008                    |

a – viscosity and density measurements performed at 20°C.

**Table S2.** Properties of molecular solvents<sup>a</sup>

| Entry | solvent              | Viscosity, mPa•s | Density, g/cm <sup>3</sup> |
|-------|----------------------|------------------|----------------------------|
| 1     | decanol              | 15               | 0.82977                    |
| 2     | ethylene glycol      | 21               | 1.11328                    |
| 3     | tetraethylene glycol | 59               | 1.12453                    |

a – viscosity and density measurements performed at 20°C.

**Table S3.** Properties of ionic liquids<sup>a</sup>

| Entry | Ionic Liquid                           | Viscosity, mPa•s | Density, g/cm <sup>3</sup> | Water content, ppm |
|-------|----------------------------------------|------------------|----------------------------|--------------------|
| 1     | [C <sub>4</sub> -mim]NO <sub>3</sub>   | 262              | 1.15545                    | 4140               |
| 2     | [C <sub>9</sub> -mim]NO <sub>3</sub>   | 791              | 1.05085                    | 5473               |
| 3     | [C <sub>4</sub> -mim]PF <sub>6</sub>   | 381              | 1.37045                    | 347                |
| 4     | [C <sub>9</sub> -mim]PF <sub>6</sub>   | 1324             | 1.21513                    | 290                |
| 5     | [C <sub>2</sub> -mim]NTf <sub>2</sub>  | 38               | 1.51923                    | 590                |
| 6     | [C <sub>4</sub> -mim]NTf <sub>2</sub>  | 60               | 1.43579                    | 469                |
| 7     | [C <sub>9</sub> -mim]NTf <sub>2</sub>  | 116              | 1.29499                    | 628                |
| 8     | [C <sub>12</sub> -mim]NTf <sub>2</sub> | 202              | 1.24681                    | 223                |

a – viscosity and density measurements performed at 20°C.

**Table S4.** Properties of glycerol-ethanol (80-20 v/v) mixture as a function of temperature

| Entry | T, °C | Viscosity, mPa•s | Density, g/cm <sup>3</sup> |
|-------|-------|------------------|----------------------------|
| 1     | 20    | 241              | 1.16188                    |
| 2     | 30    | 122              | 1.15515                    |
| 3     | 40    | 68               | 1.14826                    |
| 4     | 50    | 42               | 1.141274                   |
| 5     | 60    | 28               | 1.13419                    |

**Table S5.** Properties of tetraethylene glycol as a function of temperature

| Entry | T, °C | Viscosity, mPa•s | Density, g/cm <sup>3</sup> |
|-------|-------|------------------|----------------------------|
| 1     | 20    | 59               | 1.12483                    |
| 2     | 30    | 35               | 1.11688                    |
| 3     | 40    | 23               | 1.10890                    |
| 4     | 50    | 16               | 1.10093                    |
| 5     | 60    | 11               | 1.09295                    |

**Table S6.** Properties of [C<sub>4</sub>-mim]NO<sub>3</sub><sup>a</sup> as a function of temperature

| Entry | T, °C | Viscosity, mPa•s | Density, g/cm <sup>3</sup> |
|-------|-------|------------------|----------------------------|
| 1     | 20    | 258              | 1.15545                    |
| 2     | 30    | 144              | 1.14913                    |
| 3     | 40    | 85               | 1.14280                    |
| 4     | 50    | 55               | 1.13657                    |
| 5     | 60    | 37               | 1.13040                    |

a – water content: 4140 ppm

**Table S7.** Properties of [C<sub>4</sub>-mim]PF<sub>6</sub><sup>a</sup> as a function of temperature

| Entry | T, °C | Viscosity, mPa•s | Density, g/cm <sup>3</sup> |
|-------|-------|------------------|----------------------------|
| 1     | 20    | 403              | 1.37004                    |
| 2     | 30    | 209              | 1.36168                    |
| 3     | 40    | 122              | 1.35333                    |
| 4     | 50    | 77               | 1.34505                    |
| 5     | 60    | 52               | 1.33685                    |

a – water content: 252 ppm

**Table S8.** Properties of [C<sub>9</sub>-mim]PF<sub>6</sub><sup>a</sup> as a function of temperature

| Entry | T, °C | Viscosity, mPa•s | Density, g/cm <sup>3</sup> |
|-------|-------|------------------|----------------------------|
| 1     | 20    | 1346             | 1.214991                   |
| 2     | 30    | 641              | 1.20741                    |
| 3     | 40    | 334              | 1.19993                    |
| 4     | 50    | 189              | 1.19250                    |
| 5     | 60    | 114              | 1.18509                    |

a – water content: 308 ppm

**Table S9.** Effect of water on the properties of [C<sub>4</sub>-mim]NO<sub>3</sub><sup>a</sup>

| Entry          | Ionic Liquid                         | Viscosity, mPa•s | Density, g/cm <sup>3</sup> | Water content, ppm<br>(%, v/v) |
|----------------|--------------------------------------|------------------|----------------------------|--------------------------------|
| 1              | [C <sub>4</sub> -mim]NO <sub>3</sub> | 262              | 1.15545                    | 4140 (0.5)                     |
| 2              | [C <sub>4</sub> -mim]NO <sub>3</sub> | 148              | 1.15839                    | 14600 (1.7)                    |
| 3 <sup>b</sup> | [C <sub>4</sub> -mim]NO <sub>3</sub> | 32               | 1.14704                    | – (10)                         |

a – viscosity and density measurements performed at 20°C; water content in v/v was recalculated using the amount of water (density = 1 g/cm<sup>3</sup>) in a given volume of IL;

b – [C<sub>4</sub>-mim]NO<sub>3</sub> was mixed with water (v/v), and viscosity and density were determined in the same manner as for the other ILs; water content of this sample was not determined by KF-titration.

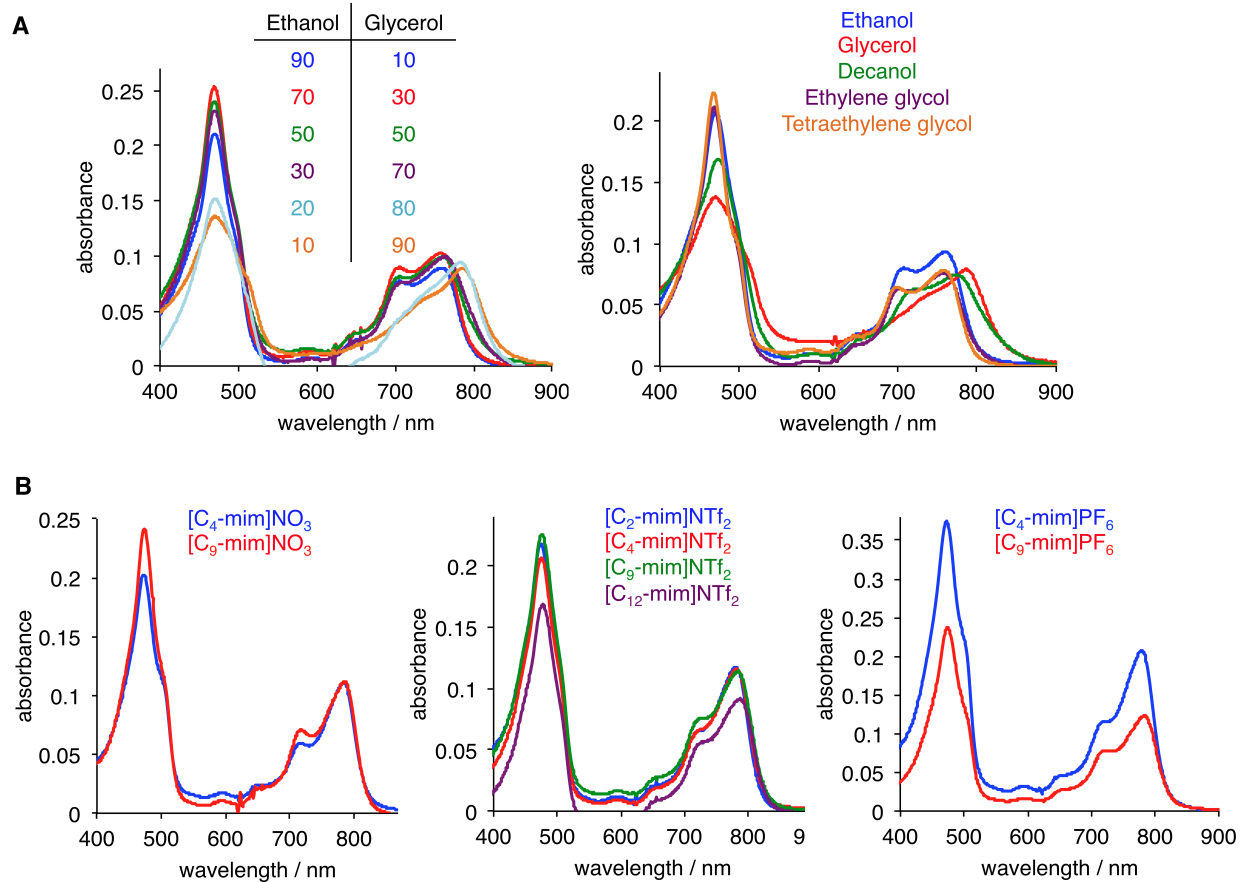

**Figure S1.** Absorption spectra of **PD** in molecular (**A**) and ionic (**B**) liquids. Conditions: **[PD]** = 1  $\mu\text{M}$ , all mixtures contain 0.1 % DMSO (v/v)



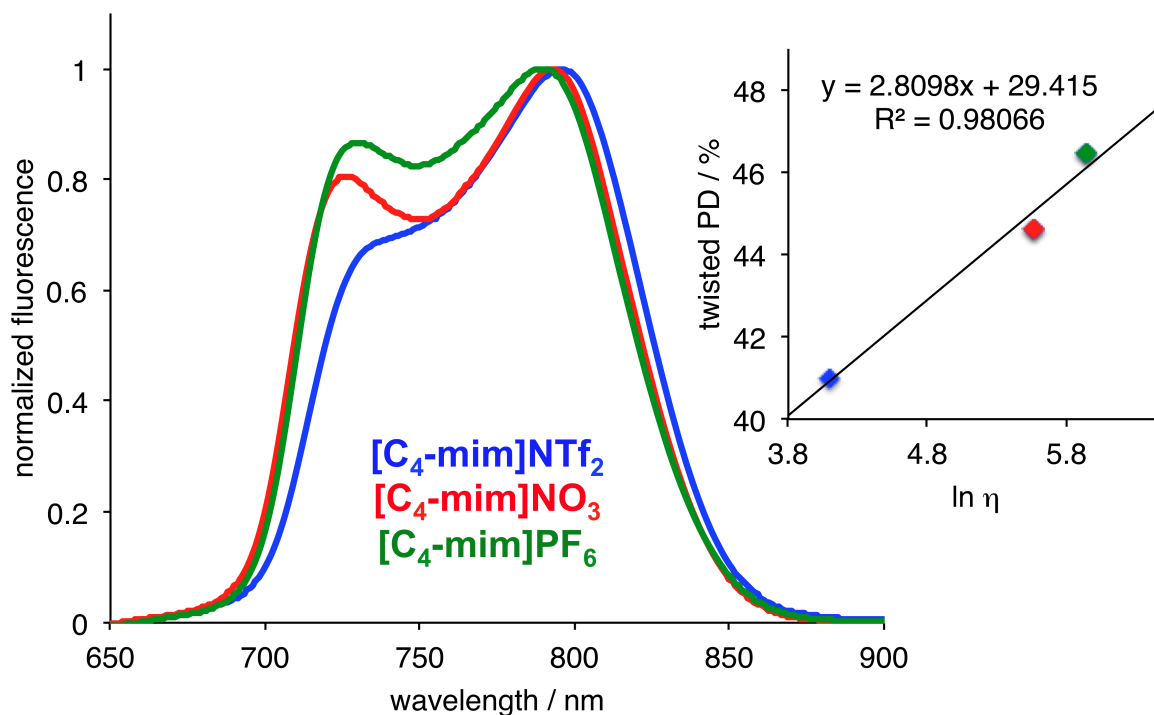

**Figure S2.** Emission spectra of **PD** in [C<sub>4</sub>-mim]-containing ionic liquids; overlaid spectra of [C<sub>4</sub>-mim]NTf<sub>2</sub>, [C<sub>4</sub>-mim]PF<sub>6</sub> and [C<sub>4</sub>-mim]NO<sub>3</sub>. Insert: **PD** conformation as a function of IL viscosity (blue symbol – [C<sub>4</sub>-mim]NTf<sub>2</sub>; red symbol – [C<sub>4</sub>-mim]NO<sub>3</sub> and green – [C<sub>4</sub>-mim]PF<sub>6</sub>). Conditions: λ<sub>ex</sub> = 475 nm, [PD] = 1 μM, all mixtures contain 0.1 % DMSO (v/v)

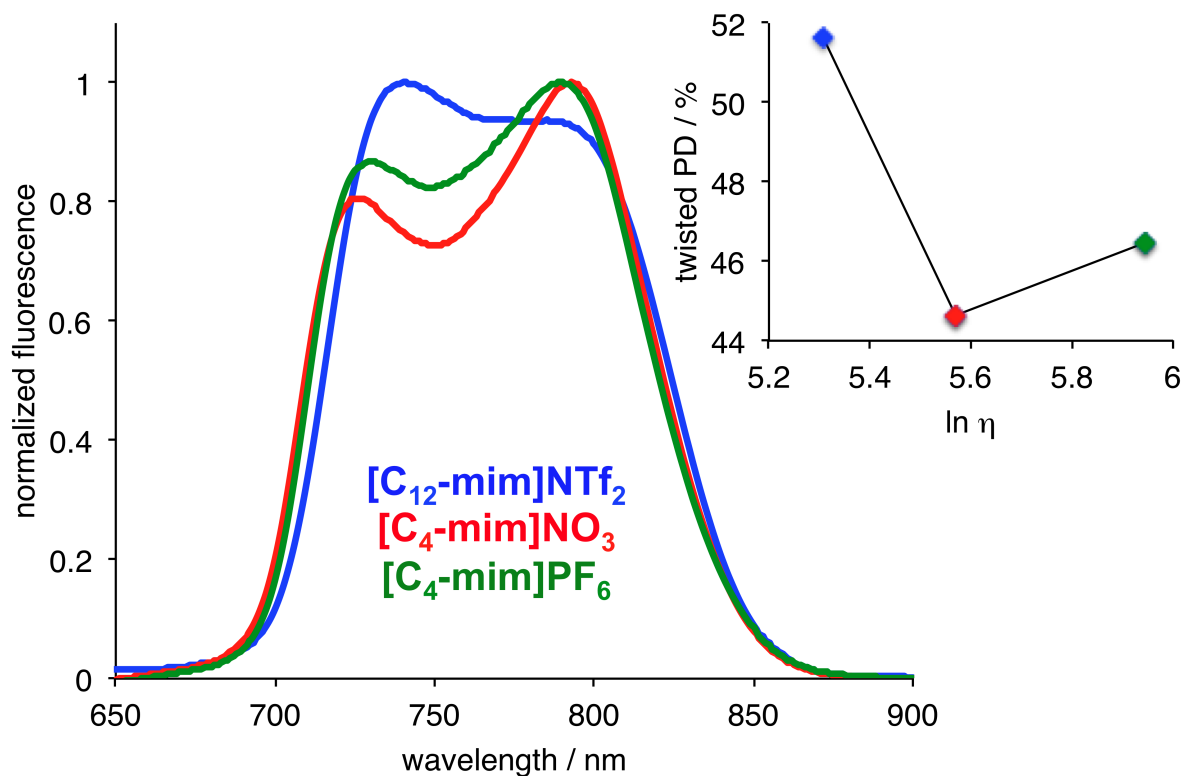

**Figure S3.** Emission spectra of **PD** in various ionic liquids; overlaid spectra of [C<sub>12</sub>-mim]NTf<sub>2</sub>, [C<sub>4</sub>-mim]NO<sub>3</sub> and [C<sub>4</sub>-mim]PF<sub>6</sub>. Insert: **PD** conformation as a function of IL viscosity (blue symbol – [C<sub>12</sub>-mim]NTf<sub>2</sub>; red symbol – [C<sub>4</sub>-mim]NO<sub>3</sub> and green – [C<sub>4</sub>-mim]PF<sub>6</sub>). Conditions:  $\lambda_{\text{ex}}$  = 475 nm, [PD] = 1  $\mu$ M, all mixtures contain 0.1 % DMSO (v/v)

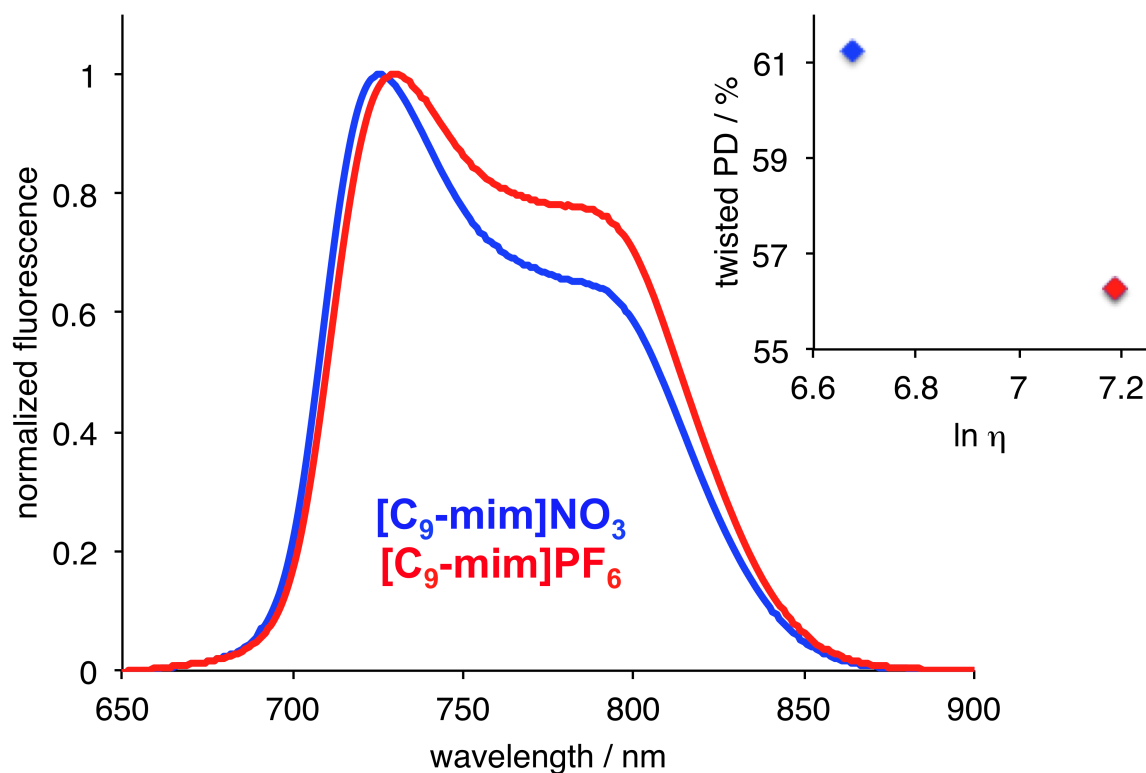

**Figure S4.** Emission spectra of **PD** in some  $[C_9\text{-mim}]$ -containing ionic liquids; overlaid spectra of  $[C_9\text{-mim}]\text{PF}_6$  and  $[C_9\text{-mim}]\text{NO}_3$ . Insert: **PD** conformation as a function of IL viscosity (blue symbol –  $[C_9\text{-mim}]\text{NO}_3$ ; red symbol –  $[C_9\text{-mim}]\text{PF}_6$ ). Conditions:  $\lambda_{\text{ex}} = 475$  nm,  $[\text{PD}] = 1 \mu\text{M}$ , all mixtures contain 0.1 % DMSO (v/v)

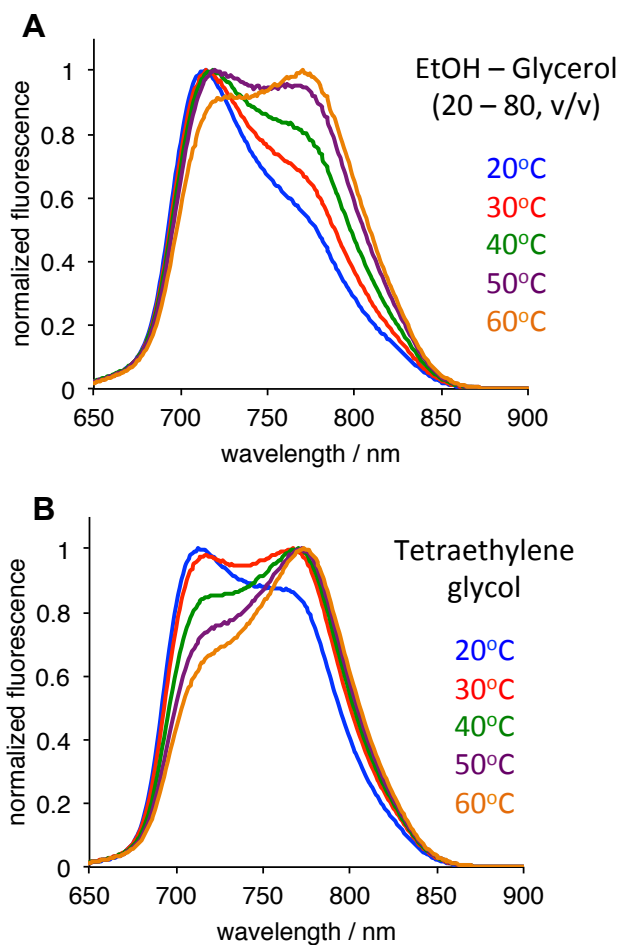

**Figure S5.** Emission spectra of **PD** in molecular solvents as a function of temperature: **A**: EtOH-glycerol (20/80 v/v); **B**: tetraethylene glycol. Conditions: **[PD]** = 1  $\mu$ M,  $\lambda_{\text{ex}}$  = 470 nm, **[DMSO]** = 0.1 % (v/v). See Tables S4 and S5 for viscosity data

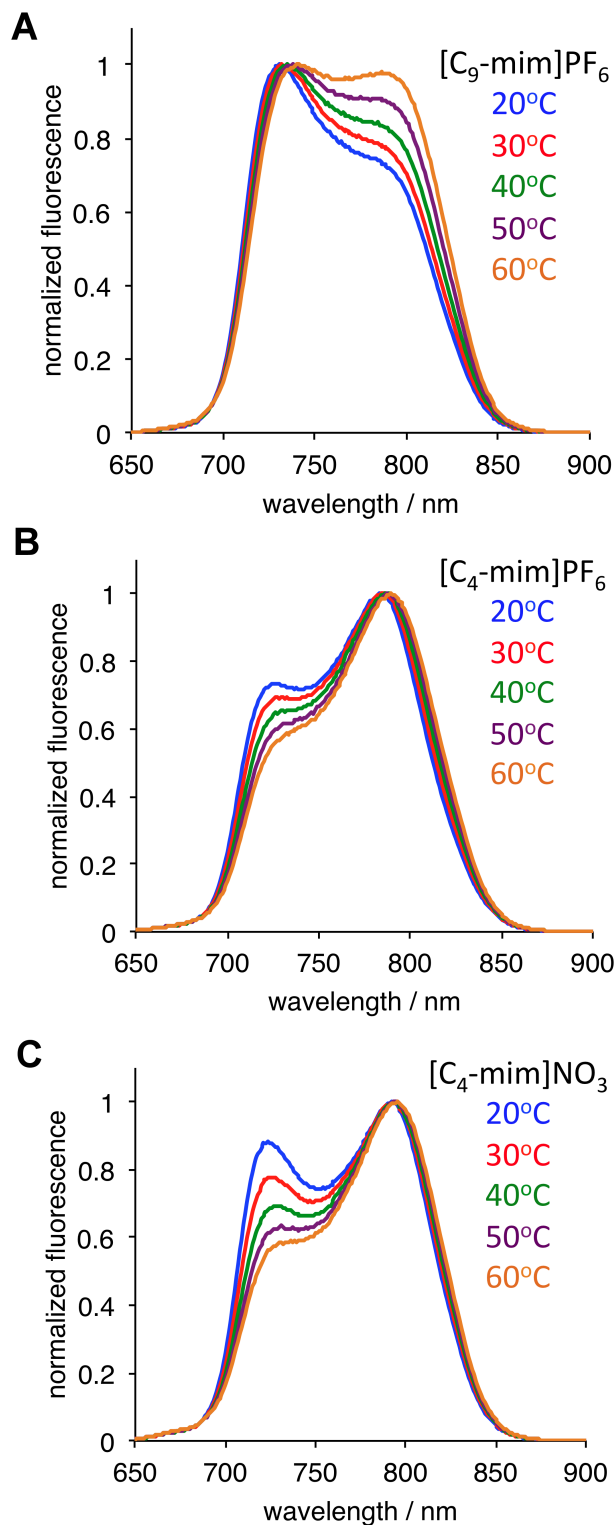

**Figure S6.** Emission spectra of **PD** in ionic liquids as a function of temperature; **A**:  $[\text{C}_9\text{-mim}]\text{PF}_6$ ; **B**:  $[\text{C}_4\text{-mim}]\text{PF}_6$ ; **C**:  $[\text{C}_4\text{-mim}]\text{NO}_3$ . Conditions:  $[\text{PD}] = 1 \mu\text{M}$ ,  $\lambda_{\text{ex}} = 475 \text{ nm}$ ,  $[\text{DMSO}] = 0.1 \%$  (v/v). See Tables S6, S7, S8 for viscosity data

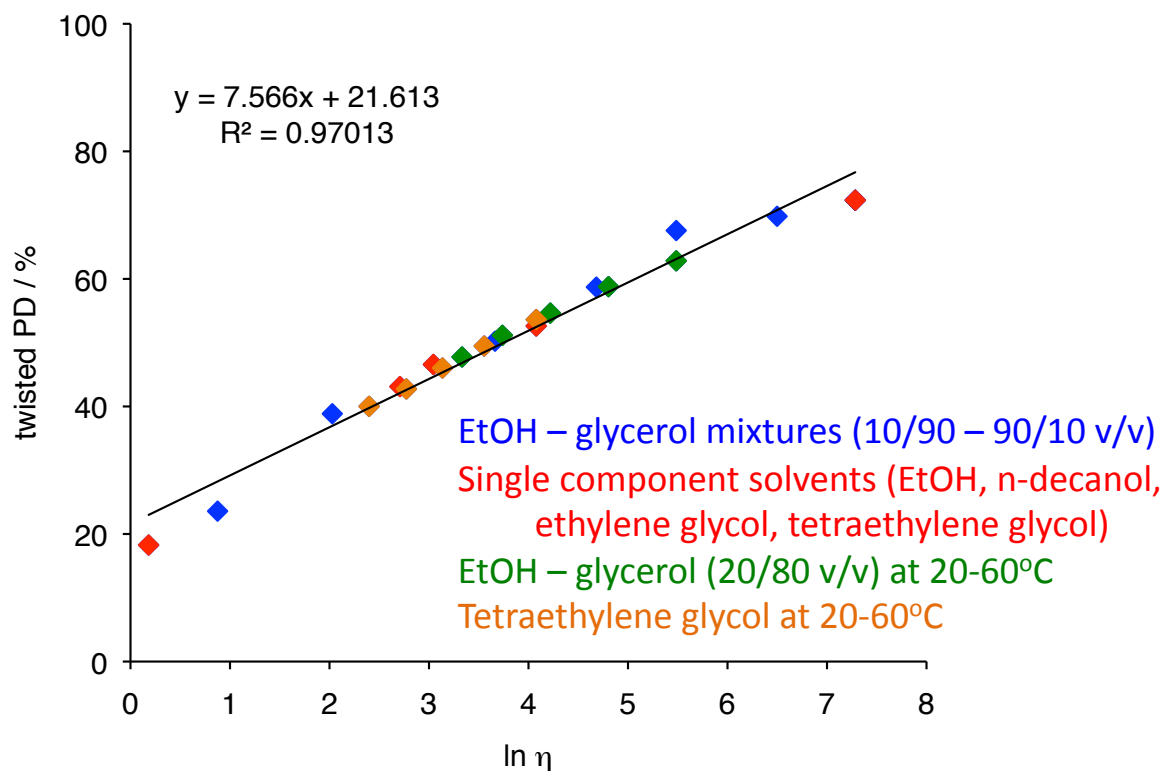

**Figure S7.** Effect of molecular solvent viscosities on the conformation of **PD** (combined data).  
Conditions: [**PD**] = 1  $\mu$ M,  $\lambda_{\text{ex}}$  = 470 nm, [DMSO] = 0.1 % (v/v)

MALDI-TOF spectrum of **PD**:  $m/z$  1974.350 ( $C_{112}H_{106}N_{10}O_{16}Zn_2$ ,  $[M-2]^+$ , requires 1974.636)

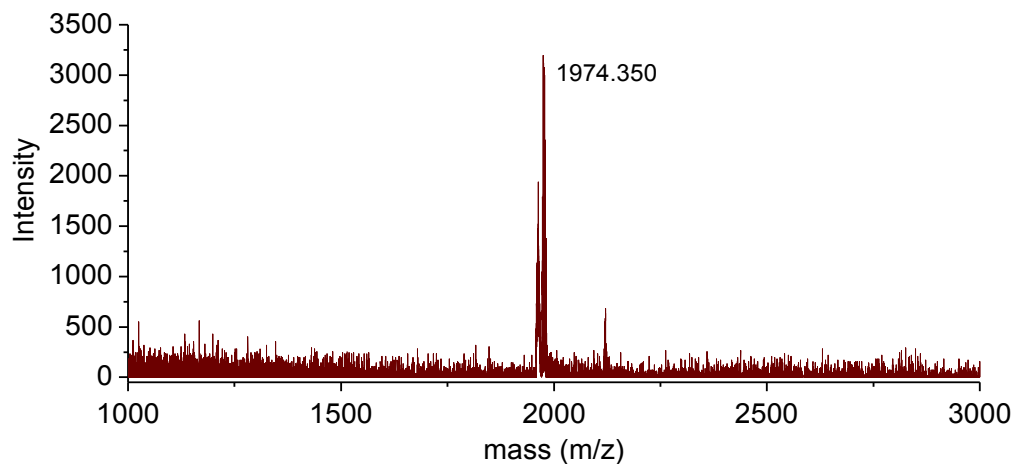

(A) absorption ( $\lambda = 469$  nm) and (B) emission ( $\lambda_{ex} = 469$  nm,  $\lambda_{em} = 775$  nm) HPLC chromatograms of **PD**.

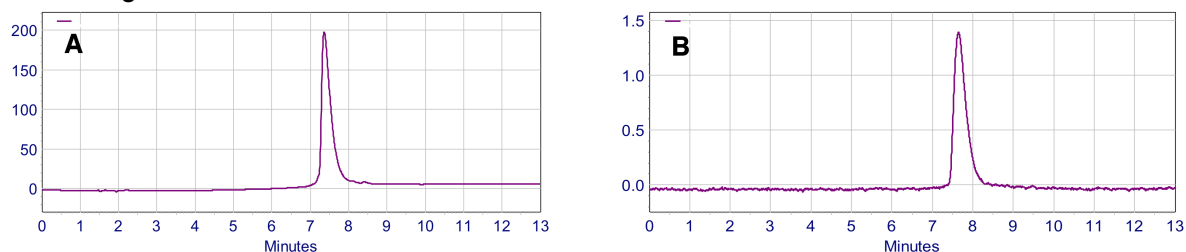

Solvent gradient used for HPLC of **PD**. Conditions: flow rate: 1 mL/min, Temperature: 30 °C

| Time (min) | 1% $CH_3CO_2H$ in $H_2O$ (%) | $CH_3OH$ (%) | THF (%) |
|------------|------------------------------|--------------|---------|
| 0          | 70                           | 25           | 5       |
| 8.0        | 15                           | 25           | 60      |
| 10.0       | 15                           | 25           | 60      |
| 11.0       | 70                           | 25           | 5       |
| 13.0       | 70                           | 25           | 5       |

**Figure S8.** MALDI-TOF and HPLC of **PD**.

## References

1. (a) J. G. Huddleston, H. D. Willauer, R. P. Swatloski, A. E. Visser and R. D. Rogers, *Chem. Commun.*, 1998, 1765; (b) S. V. Dzyuba and R. A. Bartsch, *J. Heterocyclic Chem.*, 2001, **38**, 265; (c) S. V. Dzyuba, K. D. Kollar and S. S. Sabnis, *J. Chem. Ed.*, 2009, **86**, 856.
2. M. Balaz, H. A. Collins, E. Dahlstedt and H. L. Anderson, *Org. Biomol. Chem.*, 2009, **7**, 874.
3. N. W. Smith, S. P. Gourisankar, J.-L. Montchamp and S. V. Dzyuba, *New J. Chem.*, 2011, **35**, 909.
4. L. P. Jameson and S. V. Dzyuba, *RSC Adv.*, 2013, **3**, 4582.
5. S. V. Dzyuba and R. A. Bartsch, *ChemPhysChem*, 2002, **3**, 161.
6. M. Blesic, M. H. Marques, N. V. Plechkova, K. R. Seddon, L. P. N. Rebelo and A. Lopes, *Green Chem.*, 2007, **9**, 481.
